# Supplementary material for: RSL24D1 sustains steady-state ribosome biogenesis and pluripotency translational programs in embryonic stem cells
Source: bioRxiv or medRxiv preprint supplement (doi:10.1101/2021.05.27.443845), 2021-05-27

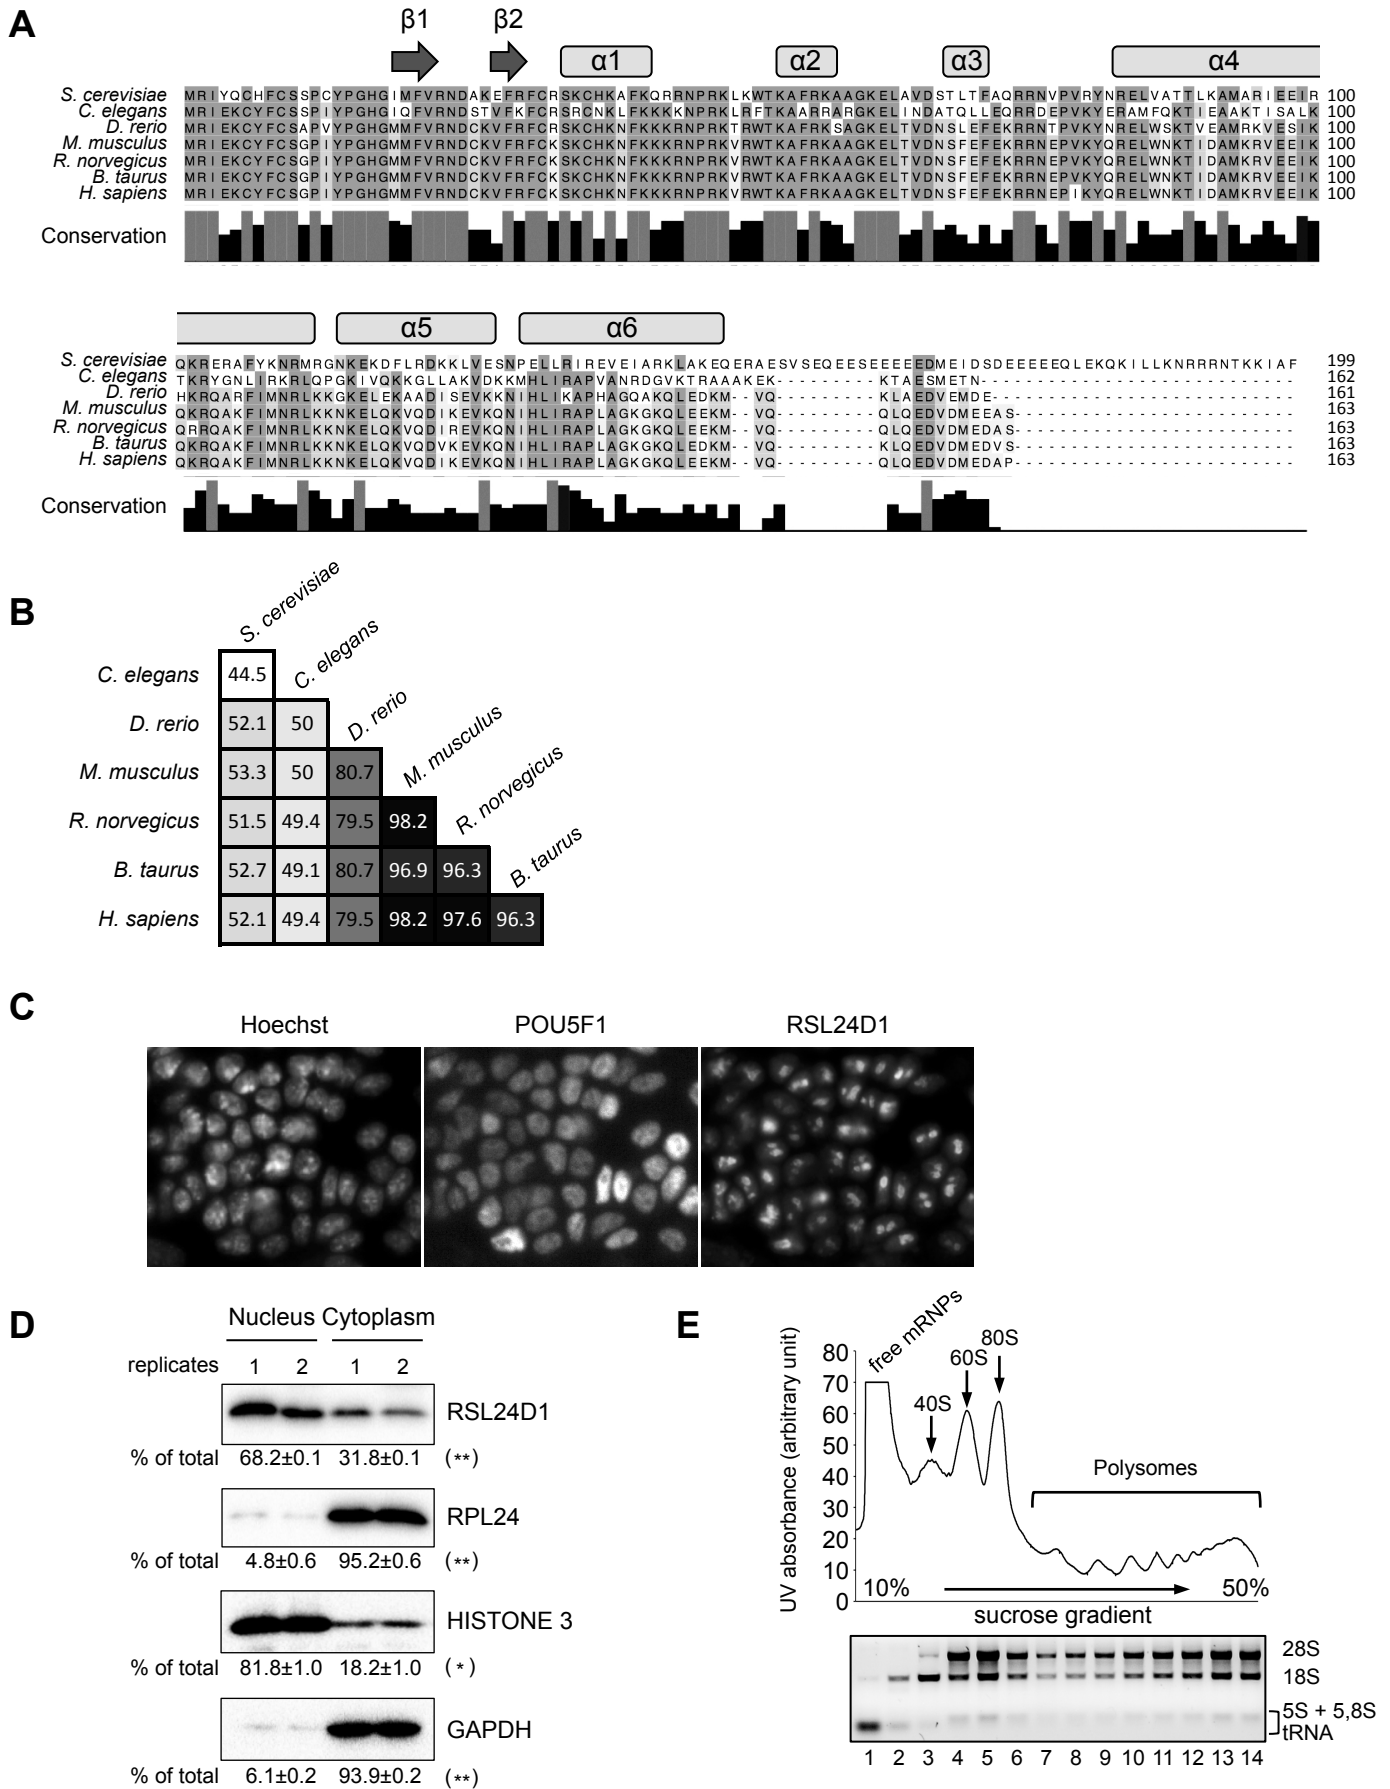

Supplement: Supplementary file [file media-6.pdf]
